RICHARD J. TRAYSTMAN, PH.D.  
*Professor*

*Department of Anesthesiology/Critical Care Medicine  
Johns Hopkins  
600 North Wolfe Street/CMSC 7-110  
Baltimore, Maryland 21205*

#### REFERENCES

1. Eger EI, Saidman LJ, Brandstater: Minimum alveolar anesthetic concentration: A standard of anesthetic potency. *ANESTHESIOLOGY* 26:756-763, 1965
2. Eger EI: MAC, Anesthetic Uptake and Action. Edited by Eger EI, Baltimore, Williams and Wilkins, 1974, pp 1-25
3. Shingu K, Eger EI, Johnson BH, Lurz FW, Hickey RF: MAC values of thiopental and fentanyl in rats. *Anesth Analg* 62:151-154, 1983
4. Bailey PL, Port JD, McJames S, Reinersman L, Stanley TH: Is fentanyl an anesthetic in the dog? *Anesth Analg* 66:542-548, 1987
5. Murphy MR, Hug CC Jr: The anesthetic potency of fentanyl in

terms of its reduction of enflurane MAC. *ANESTHESIOLOGY* 57:485-488, 1982

6. Yaster M, Koehler RC, Traystman RJ: Effects of fentanyl on peripheral and cerebral hemodynamics in neonatal lambs. *ANESTHESIOLOGY* 66:524-530, 1987
7. Yaster M, Koehler RC, Traystman RJ: Interaction of fentanyl and pentobarbital on peripheral and cerebral hemodynamics in newborn lambs. *ANESTHESIOLOGY* 70:461-469, 1989
8. Steen PA, Michenfelder JD: Cerebral protection with barbiturates, relation to anesthetic effect. *Stroke* 9:140-142, 1971
9. Wang KC: Narcotics are not expected to produce unconsciousness and amnesia. *Anesth Analg* 62:625-626, 1983
10. Lowenstein E, Philbin DM: Narcotic "anesthesia" in the eighties. *ANESTHESIOLOGY* 55:195-197, 1981
11. Lunn JK, Stanley TH, Eisele J, Webster L, Woodward A: High dose fentanyl anesthesia for coronary artery surgery: Plasma fentanyl concentrations and influence of nitrous oxide on cardiovascular responses. *Anesth Analg* 58:390-395, 1979
12. Stanley TH, Webster LR: Anesthetic requirements and cardiovascular effects of fentanyl-oxygen and fentanyl-diazepam-oxygen anesthesia in man. *Anesth Analg* 57:411-416, 1978

(Accepted for publication December 29, 1989.)

Anesthesiology  
72:769, 1990

#### Correction

*To the Editor:*—We failed to state in our article<sup>1</sup> that Ovassapian *et al.*<sup>2</sup> proposed that glycine may produce visual disturbance. It was our oversight, and there was no intention to not give credit where credit is due.

K. C. WONG, M.D., PH.D.  
*Professor of Anesthesiology and Chairman,  
Department of Anesthesiology*

JANICE MEI-LI WANG, M.D.  
*Anesthesia Research Fellow, Department of  
Anesthesiology*

DONNELL J. CREEL, PH.D.  
*Research Professor of Ophthalmology*

*The University of Utah  
50 North Medical Drive  
Salt Lake City, Utah 84132*

#### REFERENCES

1. Wang JM-L, Creel DJ, Wong KC: Transurethral resection of the prostate, serum glycine levels, and ocular evoked potentials. *ANESTHESIOLOGY* 70:36-41, 1989
2. Ovassapian A, Joshi CW, Brunner, EA: Visual disturbances: An unusual symptom of transurethral prostatic resection reaction. *ANESTHESIOLOGY* 57:332-334, 1982

(Accepted for publication January 16, 1990.)

Anesthesiology  
72:769-771, 1990

#### Cardiovascular Responses to Noxious Stimuli in Experimental Animals: "Pressor or Depressor"?

*To the Editor:*—We read with interest the recent reports by Gibbs *et al.* of cardiovascular reflex responses to noxious stimuli in rats.<sup>1,2</sup> In their study, noxious stimuli to the rat's tail were applied during halothane anesthesia by clamping with a rubber-shod clamp, a commonly

used and "standard" method of evaluating anesthetic potency for animal experiments.<sup>3</sup> In rats, increasing depth of halothane anesthesia reversed the cardiovascular responses to the noxious stimulation from the pressor (hypertensive) to the depressor (hypotensive) responses.

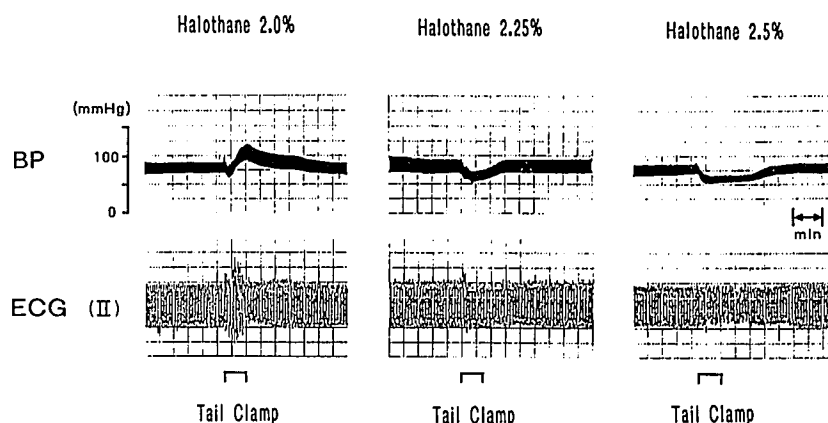

FIG. 1. Typical arterial blood pressure responses to tail clamp at inspired halothane concentration of 2%, 2.25%, and 2.5% respectively, in a spontaneously breathing rabbit. Baseline deviations in ECG tracings indicate animal movements.

The purpose of this letter is: 1) to suggest an alternative method of applying a consistent level of noxious stimuli in a manner that is easily reproducible; and 2) to report similar findings regarding the hemodynamic responses elicited by Gibbs *et al.* when either form of noxious stimulus is applied in another species.

After clamping the tail of rabbits anesthetized with halothane, we observed similar cardiovascular responses to those seen in rats; higher inspired concentration of halothane (2.25% and 2.5%) converted the pressor response to the depressor response (fig. 1). We also evaluated another form of noxious stimulus, *i.e.*, electrical current, and found

similar and consistently reproducible results. Application of the electrical stimuli (Grass S48 Stimulator) enabled us to obtain more predictable and reproducible cardiovascular responses than using the tail clamp method. These responses were either of a pressor or a depressor nature or both depending upon the intensity of stimulation and inspired halothane concentration (fig. 2).

These cardiovascular reflex responses were not significantly affected by the pretreatment with anticholinergic drug (atropine sulfate) or bilateral vagotomy. Thus, our findings are in agreement with those of Gibbs *et al.*

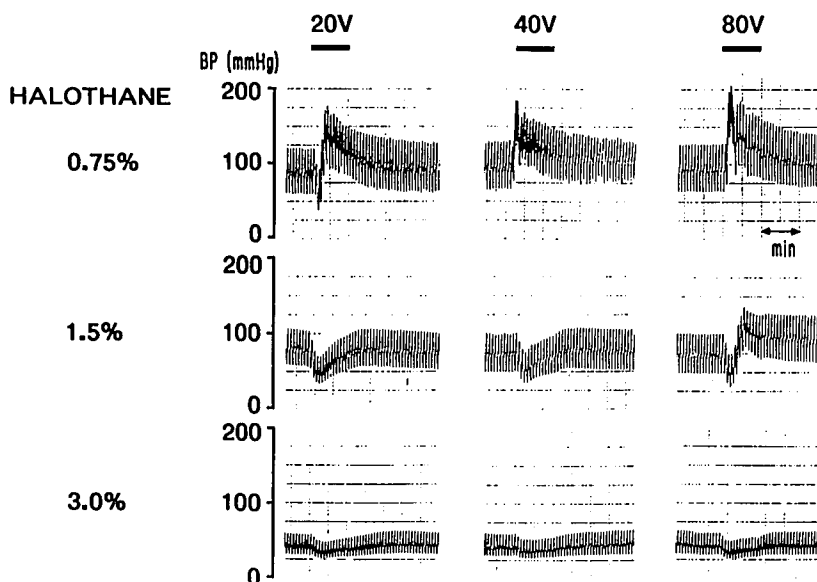

FIG. 2. Arterial blood pressure (BP) responses to electrical stimulation (square wave, 10 ms, 10 Hz) applied to the rabbit's tail with different intensities (20 V, 40 V, 80 V) and different inspired halothane concentrations (0.75%, 1.5%, 3% respectively). Black bar indicates duration of stimulation for 60 s.

ATSUO F. FUKUNAGA, M.D., PH.D.  
*Professor of Anesthesiology*

YOSHIO TANIGUCHI, M.D.  
YOSHINORI KIKUTA, M.D.  
*Research Fellows in Anesthesiology*  
*Department of Anesthesiology*  
*UCLA School of Medicine*  
*Harbor/UCLA Medical Center*  
*1000 W. Carson St.*  
*Torrance, California 90509*

#### REFERENCES

1. Gibbs NM, Larach DR, Skeehean TM, Schuler HG: Halothane induces depressor responses to noxious stimuli in the rat. *ANESTHESIOLOGY* 70:503-510, 1989
2. Gibbs NM, Larach DR, Schuler HG: The effect of neuromuscular blockade with vecuronium on hemodynamic responses to noxious stimuli in the rat. *ANESTHESIOLOGY* 71:214-217, 1989
3. Quasha AL, Eger EI II, Tinker JH: Determination and applications of MAC. *ANESTHESIOLOGY* 53:315-334, 1980

(Accepted for publication January 21, 1990.)

Anesthesiology  
72:771, 1990

### A Pain in the Neck—and Shoulder

*To the Editor:*—The phrenic nerve has been injured and anesthetized accidentally on several occasions during central venous cannulation. Permanent injury to the phrenic nerve during internal jugular vein cannulation was reported first in 1980.<sup>1</sup> In 1982, we reported a case of transient diaphragmatic paralysis<sup>2</sup> similar to that reported by Schiessler *et al.*,<sup>3</sup> except that our patient experienced respiratory distress and required therapy with continuous positive airway pressure. This patient was our fourth personally observed case of diaphragmatic weakness following internal jugular vein cannulation. Subsequently, we have treated another such case. It is possible that other patients have had similar results but were asymptomatic, thus preventing detection. Perhaps the complication is much more frequent than previously suspected. Both in our report and during other nonreported occasions, most patients have complained of shoulder pain prior to the injection of local anesthetic. Therefore, when patients complain of pain during the cannulation of the internal jugular vein, they should be asked to locate the pain. If the pain is identified in the shoulder, it is likely that the phrenic nerve is being stimulated or injured by the tip of the needle, which should be redirected. Further, no local anesthetic should be injected until the needle is repositioned and the patient is free of shoulder pain.

M. CHRISTINE STOCK, M.D.  
*Assistant Professor of Anesthesiology*

*Department of Anesthesiology*  
*Emory University School of*  
*Medicine*  
*1365 Clifton Road, N.E.*  
*Atlanta, Georgia 30322*

JOHN B. DOWNS, M.D.  
*Professor and Chairman*  
*Department of Anesthesiology*  
*University of South Florida*  
*12901 Bruce B. Downs Boulevard*  
*Tampa, Florida 33612-4799*

#### REFERENCES

1. Senior RM: Phrenic nerve injury associated with venipuncture of the internal jugular vein. *Chest* 78:777-779, 1980
2. Stock MC, Downs JB: Transient phrenic nerve blockade during internal jugular vein cannulation using the anterolateral approach. *ANESTHESIOLOGY* 57:230-233, 1982
3. Schiessler R, Helmer M, Kovarik J, Luger A: Phrenic nerve block as a complication of local anesthetic infiltration for internal jugular vein catheterization. *ANESTHESIOLOGY* 71:812-813, 1989

(Accepted for publication January 21, 1990.)

Anesthesiology  
72:771-772, 1990

### Cardiac Arrest in a Day Surgery Patient

*To the Editor:*—In a recent Case Report,<sup>1</sup> Dr. Hanson suggested that a presumed cardiac arrest during induction of general anesthesia in the Day Surgery Unit (DSU) at the University of Pennsylvania might have been avoided by a more thorough preoperative evaluation.

First, from the description provided in the Case Report, it is not clear that the patient even experienced a cardiac arrest. Both the automated blood pressure cuff and the pulse oximeter are unreliable in the presence of acute hypotension and bradycardia. Second, to suggest
